# Supplementary material for: Phyto-inspired and scalable approach for the synthesis of PdO–2Mn2O3: a nano-material for application in water splitting electro-catalysis
Source: Royal Society of Chemistry journal article supplement (doi:10.1039/d0ra04571c), 2020-01-01
Supplement: d0ra04571c1.pdf [file d0ra04571c1.pdf]

## Phyto-inspired and scalable approach for synthesis of PdO-2Mn<sub>2</sub>O<sub>3</sub>:nano-material for application in water splitting electrocatalysis

<sup>a</sup>Taghazal Zahra, <sup>a</sup>Khuram shahzad Ahmad, <sup>b</sup>Andrew Thomas, <sup>c</sup>Camila Zequine,  
<sup>c</sup>Ram K. Gupta, <sup>b</sup>Mohammad Azad Malik, <sup>d</sup>Manzar Sohail

<sup>a</sup> Department of Environmental Sciences, Fatima Jinnah Women University, The Mall, Rawalpindi

<sup>b</sup> Department of Materials, Photon Science Institute and Sir Henry Royce Institute, Alan Turing Building The University of Manchester, Oxford Road, Manchester M13 9PL, UK

<sup>c</sup> Department of Chemistry, Pittsburg State University, 1701 South Broadway Street  
Pittsburg, KS 66762, USA

<sup>d</sup> School of Natural Sciences, National University of Sciences and Technology (NUST), Islamabad

\*Corresponding Email: [chemist.phd33@fjwu.edu.pk](mailto:chemist.phd33@fjwu.edu.pk) ;  
[dr.k.s.ahmad@fjwu.edu.pk](mailto:dr.k.s.ahmad@fjwu.edu.pk)

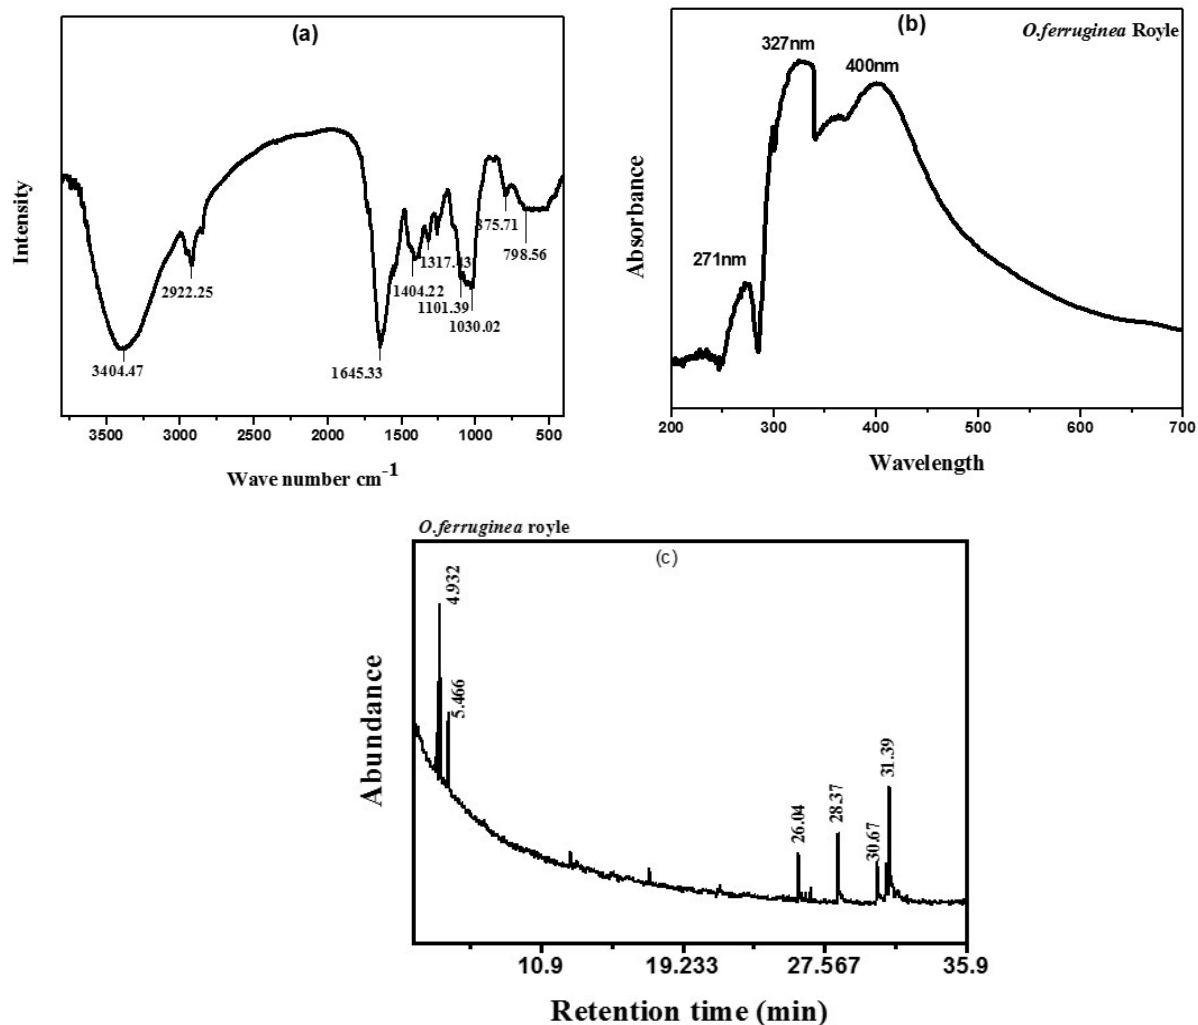

**Figure S-1: (a) FTIR spectrum (b) UV-vis spectrum (c) GCMS chromatogram of *Olea ferruginea* royle leave extract**

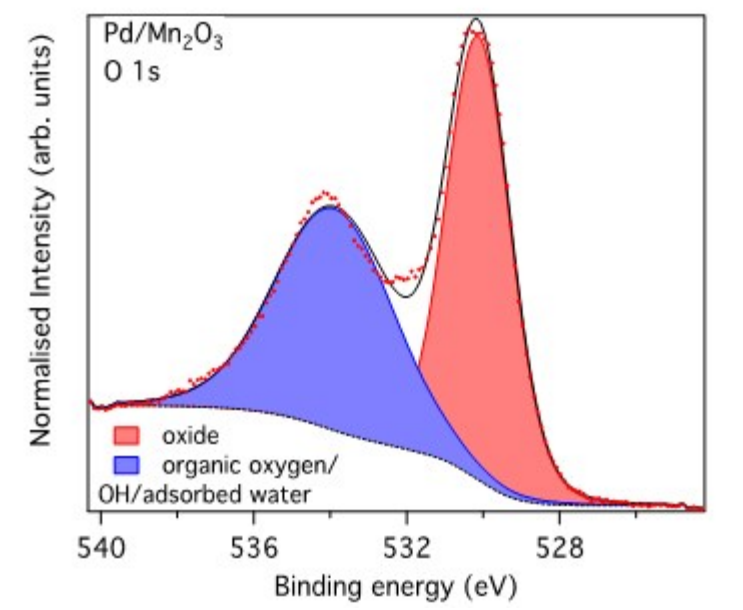

**Figure S-2: XPS-O1s core level spectra recorded from PdO-2Mn<sub>2</sub>O<sub>3</sub>**

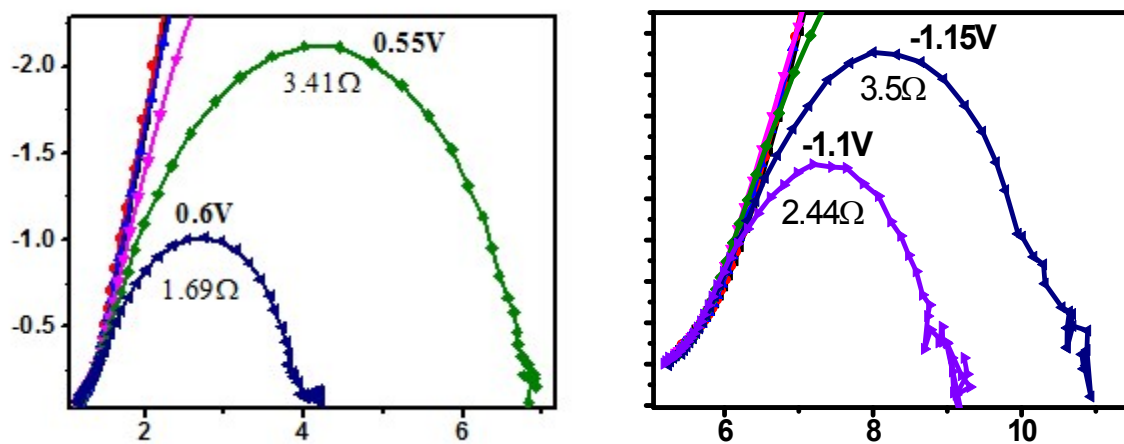

**Figure S-3: (a) Inset of OER Nyquist plot at various over-potentials (b) Inset of HER Nyquist plot at various over-potentials**

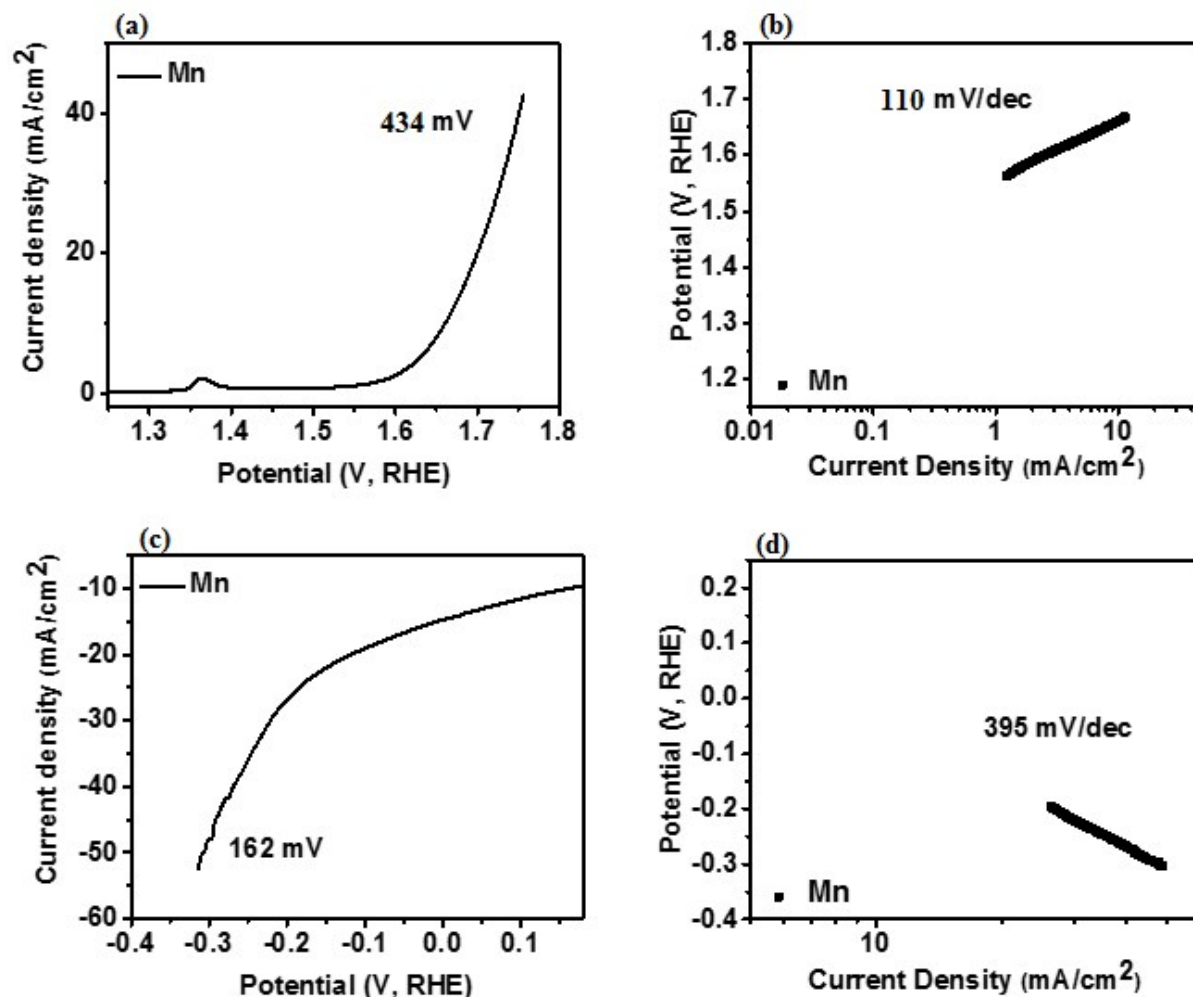

Figure S-4: Electro-catalytic behavior of individual  $\text{Mn}_3\text{O}_4$  : (a) OER over-potential (b) Tafel slope for OER (c) HER over-potential plot and (d) Tafel slope for HER

Table (S-1): FTIR peak values and Functional groups of *O.ferruginea* Royle plant

|                   | Peaks   | Bond                   | Functional group         |
|-------------------|---------|------------------------|--------------------------|
| OFR leave extract | 3404.47 | O-H stretch, H bonded  | Alcohols, phenols, water |
|                   | 2922.25 | C-H stretch            | Alkanes                  |
|                   | 1645.33 | -C=C- stretch          | Alkenes                  |
|                   | 1404.22 | -C-C stretch (in ring) | Aromatics                |
|                   | 1317.43 | N-O asymmetric stretch | Nitro compounds          |

|  |         |                                |                                                                  |
|--|---------|--------------------------------|------------------------------------------------------------------|
|  | 1261.49 | C-N stretch, C-O, C-H wag      | Amines, alcohols, carboxylic acids, esters, ethers alkyl halides |
|  | 1101.39 | C-N stretch<br>C-O,<br>C-H wag | Amines, alcohols, carboxylic acids, esters, ethers alkyl halides |
|  | 1030.02 | C-N stretch                    | Aliphatic amines                                                 |
|  | 875.71  | =C-H bend                      | Alkenes                                                          |
|  | 748.56  | =C-H bend, C-Cl stretch        | alkyl halides                                                    |

**Table-S2: Phytochemical analysis of methanol extract of OFR leave extract by GCMS**

| Retention time | Area (%) | Height (%) | F. wt (g/mol) | Formula                                       | Compound name          | Structure                                                                             |
|----------------|----------|------------|---------------|-----------------------------------------------|------------------------|---------------------------------------------------------------------------------------|
| 4.932          | 27.03    | 24.65      | 149           | C <sub>9</sub> H <sub>11</sub> NO             | Cathinone              | 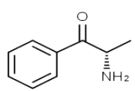   |
| 5.46           | 12.47    | 10.91      | 151           | C <sub>9</sub> H <sub>13</sub> NO             | Benzenemethanol        |   |
| 26.04          | 4.68     | 7.63       | 125           | C <sub>8</sub> H <sub>15</sub> N              | 3-Azabicyclo nonane    |  |
| 28.36          | 9.45     | 11.46      | 146           | C <sub>6</sub> H <sub>10</sub> O <sub>4</sub> | Propanedioic acid      |  |
| 31.391         | 19.43    | 18.20      | 127           | C <sub>8</sub> H <sub>17</sub> N              | 1-cyclohexylethylamine |  |
